# Supplementary material
Source: PubMed Central journal article supplement (PMC3887946)
Supplement: molcell-36-2-177-12-supplementary.pdf [file molcell-36-2-177-12-supplementary.pdf]

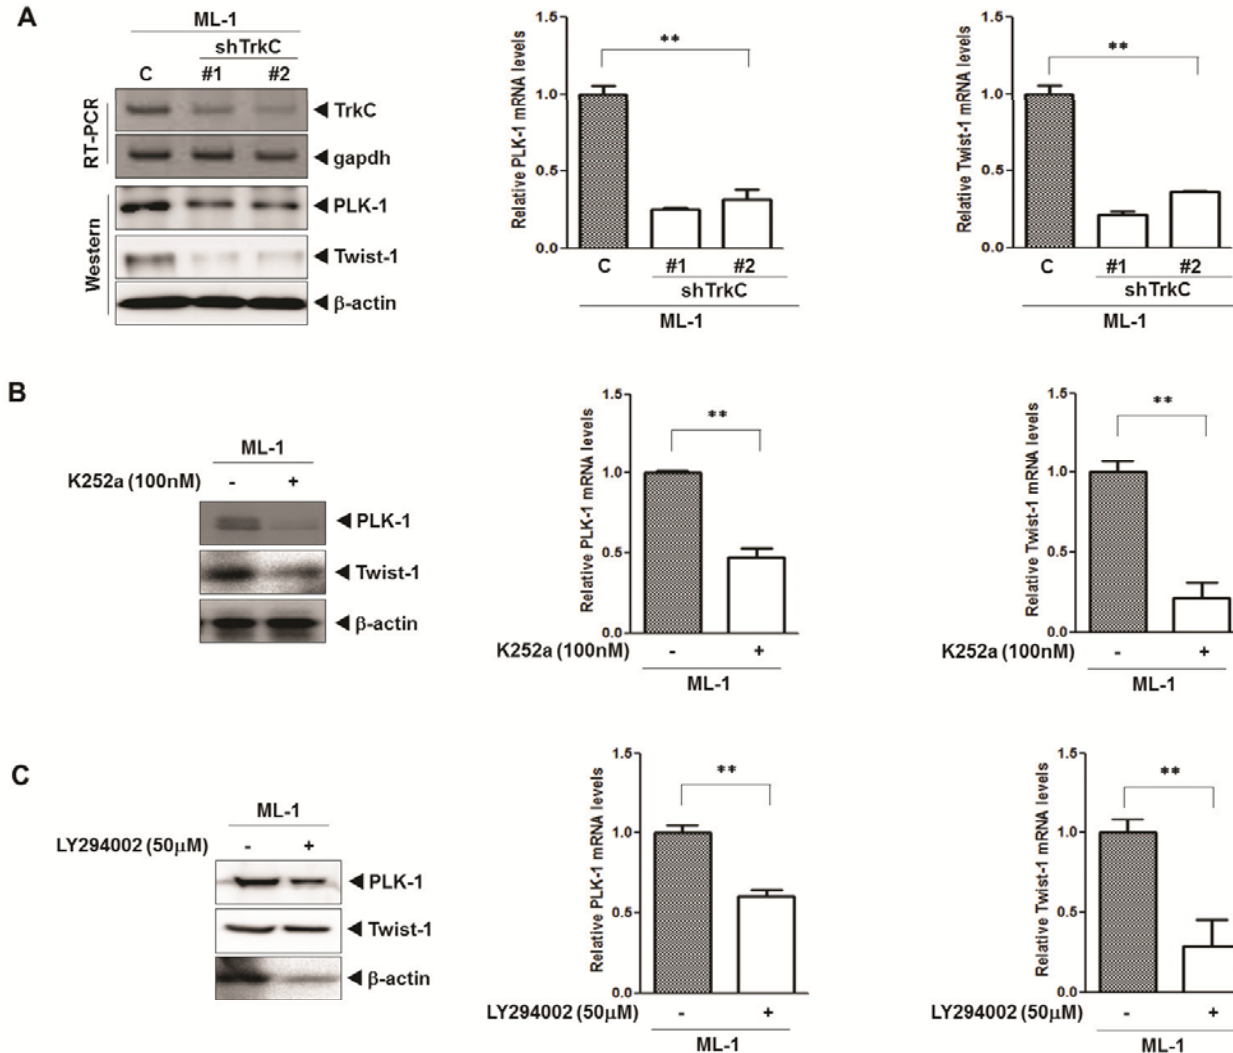

**Supplementary Figure 1.** TrkC induces PLK-1 and Twist-1 through Akt activation. (A) The relative expression levels of PLK-1, and Twist-1 was examined with immunoblotting and quantitative RT-PCR in ML-1 control-shRNA or ML-1 TrkC-shRNA cells. The data are reported as the mean  $\pm$  SEM.  $**P < 0.05$  as determined by the Student's t-test. (B) The relative expression levels of PLK-1, and Twist-1 was examined with immunoblotting and quantitative RT-PCR in ML-1 cells after K252a treatment. The data are reported as the mean  $\pm$  SEM.  $**P < 0.05$  as determined by a Student's t-test. (C) The relative expression levels of PLK-1, and Twist-1 was examined with immunoblotting and quantitative RT-PCR in ML-1 cells after LY294002 treatment. The data are reported as the mean  $\pm$  SEM.  $**P < 0.05$  as determined by a Student's t-test.

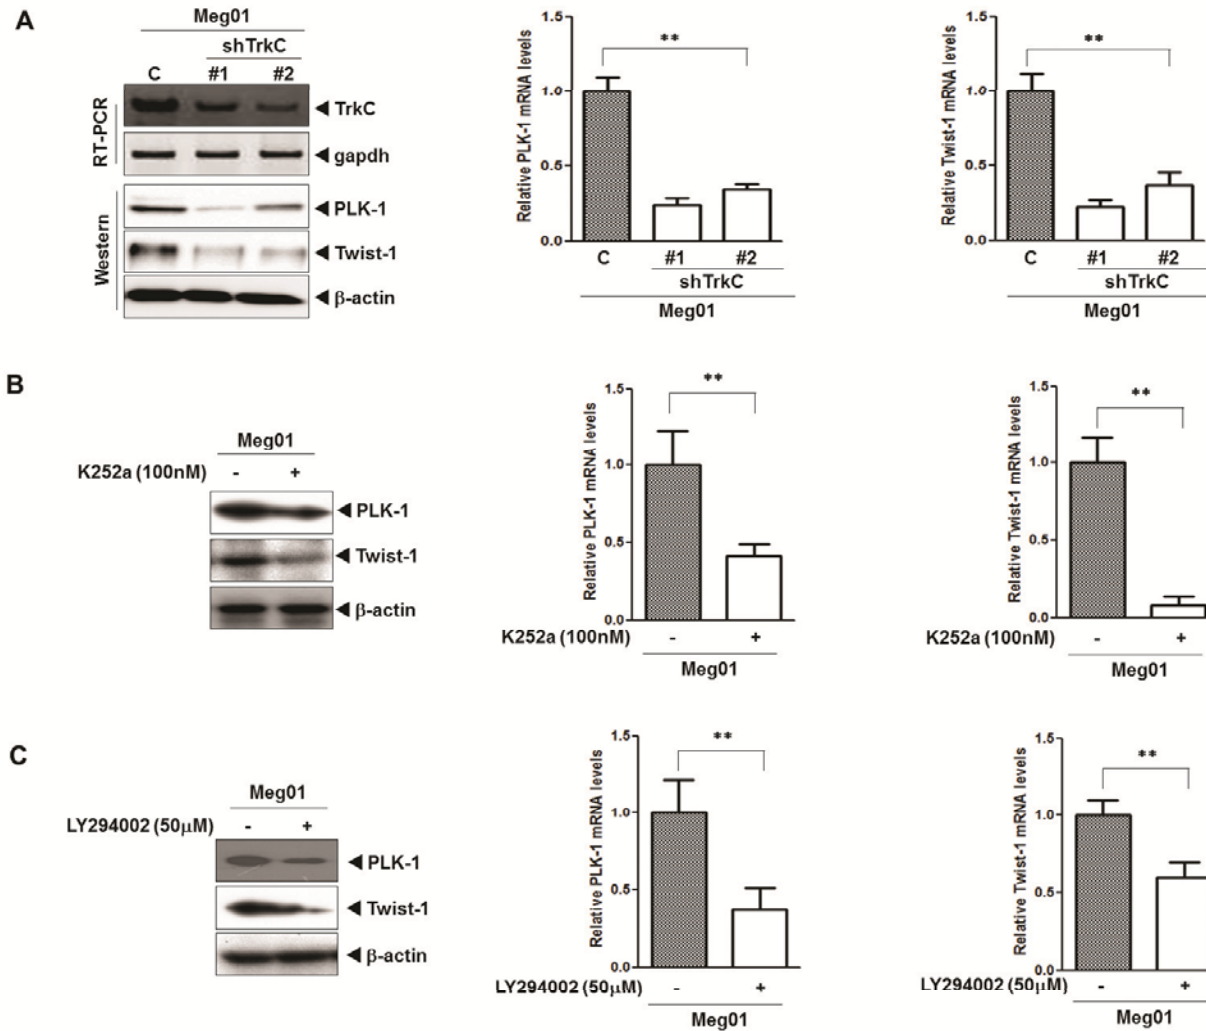

**Supplementary Figure 2.** TrkC induces PLK-1 and Twist-1. (A) The relative expression levels of PLK-1, and Twist-1 was examined with immunoblotting and quantitative RT-PCR in Meg01 control-shRNA or Meg01 TrkC-shRNA cells. The data are reported as the mean  $\pm$  SEM.  $**P < 0.05$  as determined by the Student's t-test. (B) The relative expression levels of PLK-1, and Twist-1 was examined with immunoblotting and quantitative RT-PCR in Meg01 cells after K252a treatment. The data are reported as the mean  $\pm$  SEM.  $**P < 0.05$  as determined by a Student's t-test. (C) The relative expression levels of PLK-1, and Twist-1 was examined with immunoblotting and quantitative RT-PCR in Meg01 cells after LY294002 treatment. The data are reported as the mean  $\pm$  SEM.  $**P < 0.05$  as determined by a Student's t-test.

**Supplementary Table 1. shRNA sequences of human TrkC genes.**

| Gene name | Primer sequences                                                   | Vector |
|-----------|--------------------------------------------------------------------|--------|
| TrkC #1   | 5'- CCGGCTGGGTGAGGGAGCCTTTG CTCGAG<br>CAAAGGCTCCCTCACCCAGTTTTTG-3' | pLKO   |
| TrkC #2   | 5'- CCGGATGCTCCACATTGCCAGTC CTCGAG<br>GACTGGCAATGTGGAGCATTTTTTG-3' | pLKO   |

**Supplementary Table 2. Quantitative RT-PCR primers for SYBR-GREEN.**

| Gene name | Primer sequences                                                                         |
|-----------|------------------------------------------------------------------------------------------|
| PLK-1     | Plk1 Forward: 5'- GGCAACCTTTTCCTGAATGA-3<br>Plk1 Reverse: 5'- TCCCACACAGGGTCCTTCTTC-3    |
| Twist-1   | Twist-1 Forward: 5'- CGACGAGCTGGACTCCAAG-3<br>Twist-1 Reverse: 5'- CCTCCATCCTCCAGACCGA-3 |
| 18S       | 18S Forward: 5'- ACCGCAGCTAGGAATAATGGA-3<br>18S Reverse: 5'- GCCTCAGTTCCGAAA ACCA-3      |
